# Supplementary material for: Phylogenetic Analysis of Escherichia coli Isolated from Australian Feedlot Cattle in Comparison to Pig Faecal and Poultry/Human Extraintestinal Isolates
Source: MDPI journal article supplement (doi:10.3390/antibiotics12050895), 2023-05-11
Supplement: s1 [file s1]

## Supplementary Materials

**Table S1.** Prevalence of antimicrobial resistance genes, pMLST, and Class 1 integrase gene in *E. coli* isolated from beef cattle, pig, poultry, and human.

| Sample ID   | Source      | ESBL Production | Phylogroup | MLST | Antimicrobial Resistance Genes                                                                                                                           | pMLST      | Integron     |
|-------------|-------------|-----------------|------------|------|----------------------------------------------------------------------------------------------------------------------------------------------------------|------------|--------------|
| 19MLAN001   | Beef cattle | No              | A          | 10   |                                                                                                                                                          | F2:A-B-    |              |
| 19MLAN002   | Beef cattle | No              | B1         | 297  |                                                                                                                                                          | F57:A-B43  |              |
| 19MLAN054   | Beef cattle | No              | C          | 88   | <i>aph(3')-Ia, aph(3'')-Ib, aph(6)-Id, bla<sub>TEM-1B</sub>, dfrA5, sul2</i>                                                                             | F2:A-B1    | <i>intI1</i> |
| 19MLAN112   | Beef cattle | Yes             | A          | 1102 | <i>bla<sub>CMY-2</sub>, bla<sub>TEM-1B</sub>, dfrA5, tet(A),</i>                                                                                         | F40:A-B16  | <i>intI1</i> |
| 19MLAN305   | Beef cattle | No              | A          | 10   | <i>tet(B)</i>                                                                                                                                            | F89:A-B-   |              |
| 19MLAN307   | Beef cattle | Yes             | A          | 10   | <i>aph(3'')-Ib, aph(6)-Id, bla<sub>CTX-M-27</sub>, mph(A), sul2, tet(A)</i>                                                                              | F2:A-B-    |              |
| 19MLAN308   | Beef cattle | No              | B1         | 1665 |                                                                                                                                                          | F40:A-B-   |              |
| 19MLAN309   | Beef cattle | No              | B1         | 2602 |                                                                                                                                                          | F34:A-B16  |              |
| 19MLAN314   | Beef cattle | No              | A          | 10   | <i>tet(B)</i>                                                                                                                                            | F89:A-B-   |              |
| 19MLAN316   | Beef cattle | No              | B1         | 278  | <i>tet(B)</i>                                                                                                                                            |            |              |
| 19MLAN321   | Beef cattle | No              | A          | 1122 | <i>bla<sub>TEM-1C</sub>, tet(A)</i>                                                                                                                      | F-A-B38    |              |
| 19MLAN324   | Beef cattle | No              | A          | 10   | <i>aph(3'')-Ib, aph(6)-Id, bla<sub>TEM-1B</sub>, tet(B),</i>                                                                                             | F104:A-B16 |              |
| 19MLAN325   | Beef cattle | Yes             | B1         | 1494 | <i>bla<sub>CTX-M-15</sub>, mph(E), mph(A), msr(E), tet(A)</i>                                                                                            | F40:A-B-   |              |
| 19MLAN330   | Beef cattle | Yes             | E          | 3381 | <i>bla<sub>CMY-2</sub></i>                                                                                                                               | F57:A-B16  |              |
| 19MLAN333   | Beef cattle | No              | A          | 10   | <i>aph(3'')-Ib, aph(6)-Id, bla<sub>TEM-1B</sub>, tet(B)</i>                                                                                              | F104:A-B16 |              |
| 19MLAN338   | Beef cattle | No              | A          | 2035 | <i>sul2</i>                                                                                                                                              |            |              |
| 19MLAN341   | Beef cattle | No              | A          | 10   | <i>aph(3'')-Ib, aph(6)-Id, bla<sub>TEM-1B</sub>, tet(B)</i>                                                                                              | F104:A-B16 |              |
| 19MLAN344   | Beef cattle | No              | B1         | 515  | <i>bla<sub>TEM-1B</sub></i>                                                                                                                              | F18:A5:B1  |              |
| 19MLAN347   | Beef cattle | Yes             | A          | 10   | <i>aph(3'')-Ib, aph(6)-Id, bla<sub>CTX-M-27</sub>, sul2, mph(A), tet(A)</i>                                                                              | F2:A-B-    |              |
| 19MLAN348   | Beef cattle | No              | B1         | 515  | <i>tet(A)</i>                                                                                                                                            | F89:A-B-   |              |
| 19MLAN351   | Beef cattle | No              | B1         | 278  | <i>tet(B)</i>                                                                                                                                            |            |              |
| 19MLAN352   | Beef cattle | No              | B1         | 278  | <i>tet(B)</i>                                                                                                                                            |            |              |
| 19MLAN354   | Beef cattle | Yes             | B1         | 9967 | <i>aac(3)-IV, aph(4)-Ia, aph(3'')-Ib, aph(6)-Id, ant(3'')-Ia, bla<sub>CTX-M-15</sub>, bla<sub>TEM-1B</sub>, cmlA1, dfrA12, qnrS1, sul1, sul3, tet(A)</i> |            | <i>intI1</i> |
| 19MLAN355   | Beef cattle | No              | B1         | 641  | <i>tet(A)</i>                                                                                                                                            | F95:A-B-   |              |
| 19MLAN358   | Beef cattle | No              | B1         | 223  | <i>bla<sub>TEM-1C</sub>, tet(A)</i>                                                                                                                      | F89:A-B-   |              |
| 19MLAN369   | Beef cattle | No              | B1         | 109  | <i>aph(3'')-Ib, aph(6)-Id, sul2, tet(B)</i>                                                                                                              | F95:A-B-   |              |
| 19MLAN373   | Beef cattle | No              | B1         | 109  | <i>aph(3'')-Ib, aph(6)-Id, sul2, tet(B)</i>                                                                                                              | F95:A-B-   |              |
| 19MLAN381   | Beef cattle | No              | A          | 10   | <i>aph(3'')-Ib, aph(6)-Id, bla<sub>TEM-1B</sub>, tet(B)</i>                                                                                              | F-A-B16    |              |
| 19MLAN385   | Beef cattle | No              | A          | 2035 | <i>sul2, tet(B)</i>                                                                                                                                      |            |              |
| 19MLAN396   | Beef cattle | No              | A          | 10   |                                                                                                                                                          | F-A-B57    |              |
| 19MLAN401   | Beef cattle | No              | A          | 278  | <i>tet(B)</i>                                                                                                                                            |            |              |
| 19MLAN413   | Beef cattle | No              | B1         | 278  | <i>tet(B)</i>                                                                                                                                            |            |              |
| 19MLAN415   | Beef cattle | No              | B1         | 641  | <i>tet(A)</i>                                                                                                                                            | F89:A-B-   |              |
| 19MLAN423   | Beef cattle | Yes             | A          | 540  | <i>aph(3'')-Ib, aph(6)-Id, bla<sub>CTX-M-15</sub>, bla<sub>TEM-1B</sub>, dfrA14, sul2, tet(A)</i>                                                        | F-A-B53    | <i>intI1</i> |
| 19MLAN435   | Beef cattle | No              | B1         | 278  | <i>tet(B)</i>                                                                                                                                            |            |              |
| 19MLAN442   | Beef cattle | No              | B1         | 278  | <i>tet(A)</i>                                                                                                                                            |            |              |
| 19MLAN443   | Beef cattle | No              | B1         | 58   | <i>aph(3'')-Ib, aph(6)-Id, sul2, tet(B)</i>                                                                                                              |            |              |
| SRR11658524 | Pig         | NA              | A          | 744  | <i>aadA1, aadA2, aadA5, aph(3')-Ia, aph(3'')-Ib, aph(6)-Id, bla<sub>TEM-1B</sub>, catA1, cmlA1, dfrA12, sul1, gyrA, mef(B), mph(A), tet(A), tet(B)</i>   | F10:A6:B42 | <i>intI1</i> |
| SRR11658525 | Pig         | NA              | A          | 8166 | <i>aadA1, aadA2, bla<sub>TEM-1B</sub>, cmlA1, dfrA12, sul3,</i>                                                                                          | F-A-B-     | <i>intI1</i> |
| SRR11658528 | Pig         | NA              | A          | 6615 | <i>aadA1, aadA2, bla<sub>TEM-1B</sub>, cmlA1, dfrA12, sul3, tet(A)</i>                                                                                   | F-A-B-     | <i>intI1</i> |
| SRR11658531 | Pig         | NA              | B1         | 877  | <i>bla<sub>TEM-1B</sub>, dfrA5,</i>                                                                                                                      | F34:A-B-   | <i>intI1</i> |
| SRR11658533 | Pig         | NA              | A          | 34   | <i>aph(3')-Ia, aph(3'')-Ib, aph(6)-Id, bla<sub>TEM-1B</sub>, catA1, dfrA5, sul2, tet(A), tet(B)</i>                                                      | F55:A-B1   | <i>intI1</i> |

|             |     |    |    |         |                                                                                                                                                                                            |             |              |
|-------------|-----|----|----|---------|--------------------------------------------------------------------------------------------------------------------------------------------------------------------------------------------|-------------|--------------|
| SRR11658536 | Pig | NA | A  | 8167    | <i>aadA1, aadA2, aph(3'')-Ib, aph(6)-Id, bla<sub>TEM-1B</sub>, cmlA1, dfrA12, mef(B), sul2, tet(A), tet(B)</i>                                                                             | F-:A-:B-    | <i>intI1</i> |
| SRR11658538 | Pig | NA | A  | 361     | <i>aadA1, aadA2, aph(3')-Ia, bla<sub>TEM-1B</sub>, cmlA1, dfrA12, gyrA, mef(B), parC, sul3, tet(A)</i>                                                                                     | F-:A18:B-   | <i>intI1</i> |
| SRR11658548 | Pig | NA | A  | 48      | <i>aadA1, aadA2, bla<sub>CARB-2</sub>, cmlA1, dfrA16, gyrA, sul3, tet(A)</i>                                                                                                               | F-:A-:B-    | <i>intI1</i> |
| SRR11658549 | Pig | NA | B1 | 641     | <i>bla<sub>TEM-1B</sub>, dfrA5, sul1</i>                                                                                                                                                   | F2:A-:B1    | <i>intI1</i> |
| SRR11658550 | Pig | NA | B1 | 20      | <i>aph(3'')-Ib, aph(6)-Id, bla<sub>TEM-1B</sub>, dfrA5, sul2, tet(A)</i>                                                                                                                   | F115:A-:B42 | <i>intI1</i> |
| SRR11658553 | Pig | NA | B1 | 29      | <i>aac(3)-Iia, aadA1, aph(3'')-Ib, aph(6)-Id, bla<sub>TEM-1B</sub>, dfrA5, sul1, sul2</i>                                                                                                  | F4:A-:B40   | <i>intI1</i> |
| SRR11658554 | Pig | NA | B1 | 11081   | <i>aadA2, aph(3'')-Ib, aph(6)-Id, bla<sub>TEM-1B</sub>, dfrA12, sul1, tet(B)</i>                                                                                                           | F-:A-:B-    | <i>intI1</i> |
| SRR11658555 | Pig | NA | A  | 398     | <i>aadA1, aadA2, bla<sub>TEM-1B</sub>, cmlA1, dfrA5, dfrA12, sul3</i>                                                                                                                      | F2:A-:B1    | <i>intI1</i> |
| SRR11658556 | Pig | NA | A  | 761     | <i>aac(2')-Iia, aadA1, aadA2, bla<sub>TEM-1B</sub>, cmlA1, dfrA12, sul3, tet(B)</i>                                                                                                        | F-:A-:B-    | <i>intI1</i> |
| SRR11658557 | Pig | NA | A  | 744     | <i>aadA1, aadA2, aph(3'')-Ib, aph(6)-Id, bla<sub>TEM-1B</sub>, cmlA1, dfrA12, gyrA, parC, sul2, sul3, tet(A)</i>                                                                           | F56:A-:B20  | <i>intI1</i> |
| SRR11658558 | Pig | NA | A  | 761     | <i>aac(2')-Iia, aadA1, aadA2, bla<sub>TEM-1B</sub>, cmlA1, dfrA12, sul3, tet(B)</i>                                                                                                        | F-:A-:B-    | <i>intI1</i> |
| SRR11658560 | Pig | NA | A  | 361     | <i>aadA1, aadA2, aadA8, aph(3')-Ia, bla<sub>TEM-1B</sub>, cmlA1, dfrA12, gyrA, parC, mef(B), sul3</i>                                                                                      | F-:A18:B-   | <i>intI1</i> |
| SRR11658561 | Pig | NA | E  | 8868    | <i>aadA1, aadA2, aph(3')-Iia, aph(3'')-Ib, aph(6)-Id, bla<sub>TEM-1B</sub>, cmlA1, dfrA12, sul1, sul3, tet(A)</i>                                                                          | F40:A-:B71  | <i>intI1</i> |
| SRR11658564 | Pig | NA | A  | 10      | <i>aac(3)-IV, aph(3')-Ia, aph(3'')-Ib, aph(6)-Id, bla<sub>TEM-1B</sub>, dfrA5, sul2</i>                                                                                                    | F100:A-:B1  | <i>intI1</i> |
| SRR11658565 | Pig | NA | A  | 4628    | <i>aph(3'')-Ib, bla<sub>TEM-1B</sub>, dfrA5, tet(A)</i>                                                                                                                                    | F4:A-:B-    | <i>intI1</i> |
| SRR11658569 | Pig | NA | A  | 48      | <i>aph(3'')-Ib, aph(6)-Id, bla<sub>TEM-1B</sub>, dfrA14, sul2, tet(B)</i>                                                                                                                  | F-:A-:B-    | <i>intI1</i> |
| SRR11658570 | Pig | NA | A  | 609     | <i>aadA1, aph(3'')-Ib, bla<sub>TEM-1B</sub>, dfrA5</i>                                                                                                                                     | F2:A-:B1    | <i>intI1</i> |
| SRR11658573 | Pig | NA | B1 | 58      | <i>aph(3')-Ia, aph(3'')-Ib, aph(6)-Id, bla<sub>TEM-1B</sub>, dfrA5, sul2</i>                                                                                                               | F2:A-:B1    | <i>intI1</i> |
| SRR11658574 | Pig | NA | A  | Unknown | <i>aph(3'')-Ib, aph(6)-Id, bla<sub>TEM-1B</sub>, dfrA5, sul2, tet(A), tet(B)</i>                                                                                                           | F4:A2:B53   | <i>intI1</i> |
| SRR11658577 | Pig | NA | B1 | 154     | <i>aph(3'')-Ib, aph(6)-Id, bla<sub>TEM-1B</sub>, dfrA5, sul2, tet(A)</i>                                                                                                                   | F4:A6:B54   | <i>intI1</i> |
| SRR11658579 | Pig | NA | B1 | Unknown | <i>aadA2, aph(3'')-Ib, aph(6)-Id, bla<sub>TEM-1B</sub>, dfrA12, tet(B)</i>                                                                                                                 | F-:A-:B-    | <i>intI1</i> |
| SRR11658587 | Pig | NA | A  | 165     | <i>aph(3')-Ia, aph(3'')-Ib, aph(6)-Id, bla<sub>TEM-1B</sub>, dfrA5, sul1, sul2, tet(B)</i>                                                                                                 | F-:A-:B-    | <i>intI1</i> |
| SRR11658588 | Pig | NA | A  | 202     | <i>aadA1, aadA2, bla<sub>TEM-1B</sub>, cmlA1, dfrA12, sul3, tet(B)</i>                                                                                                                     | F-:A-:B-    | <i>intI1</i> |
| SRR11658589 | Pig | NA | A  | 398     | <i>aadA1, bla<sub>TEM-1B</sub>, cmlA1, dfrA5, dfrA12, sul3</i>                                                                                                                             | F2:A-:B1    | <i>intI1</i> |
| SRR11658591 | Pig | NA | A  | 48      | <i>aph(3'')-Ib, aph(6)-Id, bla<sub>TEM-1B</sub>, dfrA14, sul2, tet(B)</i>                                                                                                                  | F-:A-:B-    | <i>intI1</i> |
| SRR11658595 | Pig | NA | A  | 542     | <i>aadA1</i>                                                                                                                                                                               | F-:A-:B-    | <i>intI1</i> |
| SRR11658599 | Pig | NA | A  | 4429    | <i>aadA1, aadA2, bla<sub>TEM-1B</sub>, bla<sub>TEM-206</sub>, bla<sub>TEM-214</sub>, cmlA1, dfrA12, tet(A)</i>                                                                             | F-:A-:B-    | <i>intI1</i> |
| SRR11658600 | Pig | NA | A  | 398     | <i>aac(3)-IV, aph(3'')-Ib, bla<sub>TEM-1B</sub>, bla<sub>TEM-141</sub>, bla<sub>TEM-206</sub>, bla<sub>TEM-209</sub>, bla<sub>TEM-214</sub>, bla<sub>TEM-216</sub>, cmlA1, dfrA5, sul3</i> | F-:A-:B-    | <i>intI1</i> |
| SRR11658602 | Pig | NA | B1 | 20      | <i>aph(3'')-Ib, aph(6)-Id, bla<sub>TEM-1B</sub>, dfrA5, sul2, tet(A)</i>                                                                                                                   | F-:A-:B42   | <i>intI1</i> |
| SRR11658605 | Pig | NA | A  | 8170    | <i>aadA1, aadA2, aph(3'')-Ib, aph(6)-Id, dfrA5, dfrA12, sul3, tet(B)</i>                                                                                                                   | F56:A-:B-   | <i>intI1</i> |

|             |         |    |    |      |                                                                                                                              |            |              |
|-------------|---------|----|----|------|------------------------------------------------------------------------------------------------------------------------------|------------|--------------|
| SRR11658607 | Pig     | NA | B1 | 101  | <i>aph(3'')-Ib, aph(6)-Id, bla<sub>TEM-1B</sub>, dfrA5, sul2, tet(A)</i>                                                     | F4:A2:B16  | <i>intI1</i> |
| SRR11658611 | Pig     | NA | B1 | 345  | <i>aph(3'')-Ib, aph(6)-Id, bla<sub>TEM-1B</sub>, dfrA5, sul2, tet(A)</i>                                                     | F4:A-B1    | <i>intI1</i> |
| SRR11658612 | Pig     | NA | B1 | 877  | <i>aph(3')-Ia, aph(3'')-Ib, aph(6)-Id, bla<sub>TEM-1B</sub>, dfrA5, sul2, tet(A)</i>                                         | F56:A-B20  | <i>intI1</i> |
| SRR11658617 | Pig     | NA | A  | 361  | <i>aadA1, aadA2, aph(3')-Ia, bla<sub>TEM-1B</sub>, cmlA1, dfrA12, gyrA, parC, mef(B), sul3, tet(A)</i>                       | F-A18:B-   | <i>intI1</i> |
| SRR11658618 | Pig     | NA | A  | 10   | <i>aadA1, aadA2, bla<sub>TEM-1B</sub>, cmlA1, dfrA12, sul3</i>                                                               | F-A-B-     | <i>intI1</i> |
| SRR11658627 | Pig     | NA | B1 | 101  | <i>aadA1, aadA2, aph(3'')-Ib, aph(6)-Id, bla<sub>TEM-1B</sub>, cmlA1, dfrA5, dfrA12, sul2, sul3, tet(A)</i>                  | F18:A-B-   | <i>intI1</i> |
| SRR11658635 | Pig     | NA | B1 | 8168 | <i>aadA1, aadA2, bla<sub>TEM-1B</sub>, cmlA1, dfrA12, qnrS1, sul3, tet(B)</i>                                                | F-A8:B-    | <i>intI1</i> |
| SRR11658636 | Pig     | NA | A  | 361  | <i>aadA1, aadA2, aph(3')-Ia, bla<sub>TEM-1B</sub>, cmlA1, dfrA12, gyrA, mef(B), parC, sul2, tet(A)</i>                       | F-A18:B-   | <i>intI1</i> |
| SRR11658637 | Pig     | NA | A  | 226  | <i>aadA1, aadA2, bla<sub>TEM-1B</sub>, cmlA1, dfrA12, sul3, tet(B)</i>                                                       | F-A-B-     | <i>intI1</i> |
| SRR11658639 | Pig     | NA | D  | 69   | <i>aph(3'')-Ib, aph(6)-Id, bla<sub>TEM-1B</sub>, dfrA7, sul2</i>                                                             | F52:A-B48  | <i>intI1</i> |
| SRR7469840  | Poultry | NA | B2 | 95   | <i>aadA1, aph(3'')-Ib, aph(6)-Id, bla<sub>TEM-1A</sub>, dfrA1, sul1, tet(A)</i>                                              | F24:A-B1   | <i>intI1</i> |
| SRR7469841  | Poultry | NA | D  | 973  | <i>aph(3'')-Ib, aph(6)-Id, bla<sub>TEM-1B</sub>, bla<sub>TEM-206</sub>, bla<sub>TEM-214</sub>, dfrA5, sul1, sul2, tet(A)</i> | F24:A-B8   | <i>intI1</i> |
| SRR7469843  | Poultry | NA | G  | 117  | <i>dfrA5, sul1, tet (C)</i>                                                                                                  | F18:A-B1   | <i>intI1</i> |
| SRR7469859  | Poultry | NA | E  | 57   | <i>dfrA5, tet(A)</i>                                                                                                         | F2:A-B1    | <i>intI1</i> |
| SRR7469862  | Poultry | NA | B1 | 155  | <i>bla<sub>TEM-1B</sub>, dfrA5, sul1, tet(A)</i>                                                                             | F24:A-B1   | <i>intI1</i> |
| SRR7469865  | Poultry | NA | D  | 973  | <i>aph(3'')-Ib, aph(6)-Id, dfrA5, sul1, sul2, tet(A)</i>                                                                     | F24:A-B8   | <i>intI1</i> |
| SRR7469866  | Poultry | NA | D  | 8398 | <i>tet(C)</i>                                                                                                                | F82:A-B1   | <i>intI1</i> |
| SRR7469869  | Poultry | NA | G  | 117  | <i>aph(3'')-Ib, aph(6)-Id, bla<sub>CARB-2</sub>, sul1, tet(B)</i>                                                            | F24:A-B1   | <i>intI1</i> |
| SRR7469870  | Poultry | NA | B2 | 79   | <i>aac(3)-IV, aph(3'')-Ib, aph(4)-Ia, aph(6)-Id, bla<sub>TEM-1A</sub>, dfrA5, sul1, tet(A)</i>                               | F24:A-B1   | <i>intI1</i> |
| SRR7469878  | Poultry | NA | G  | 117  | <i>aph(3'')-Ib, aph(6)-Id, dfrA5, sul1, sul2, tet(B)</i>                                                                     | F18:A-B1   | <i>intI1</i> |
| SRR7469879  | Poultry | NA | G  | 117  | <i>bla<sub>TEM-1C</sub>, dfrA5, sul1</i>                                                                                     | F18:A-B1   | <i>intI1</i> |
| SRR7469880  | Poultry | NA | A  | 93   | <i>bla<sub>TEM-1B</sub>, dfrA5, tet(A)</i>                                                                                   | F24:A-B40  | <i>intI1</i> |
| SRR7469887  | Poultry | NA | B1 | 3998 | <i>aph(3')-Ia, dfrA5</i>                                                                                                     | F24:A-B1   | <i>intI1</i> |
| SRR7469893  | Poultry | NA | D  | 68   | <i>aadA1, sul1, sul2</i>                                                                                                     | F64:A-B27  | <i>intI1</i> |
| SRR7469897  | Poultry | NA | E  | 350  | <i>aadA1, sul2</i>                                                                                                           | F18:A-B1   | <i>intI1</i> |
| SRR7469899  | Poultry | NA | B2 | 131  |                                                                                                                              | F24:A-B40  | <i>intI1</i> |
| SRR7469900  | Poultry | NA | G  | 117  | <i>dfrA5, sul1, sul2, tet(B)</i>                                                                                             | F18:A-B1   | <i>intI1</i> |
| SRR7469904  | Poultry | NA | E  | 57   | <i>dfrA5, tet(A)</i>                                                                                                         | F2:A-B1    | <i>intI1</i> |
| SRR7469910  | Poultry | NA | E  | 350  | <i>aac(3)-IV, aadA1, aph(3'')-Ib, aph(4)-Ia, aph(6)-Id, bla<sub>TEM-1A</sub>, dfrA1, sul1, tet(A), tet (C)</i>               |            | <i>intI1</i> |
| SRR7967819  | Human   | NA | F  | 62   | <i>catA1, dfrA17</i>                                                                                                         | F29:A-B10  | <i>intI1</i> |
| SRR7967820  | Human   | NA | B2 | 73   |                                                                                                                              | F-A-B-     |              |
| SRR7967821  | Human   | NA | D  | 38   | <i>aadA5, aph(3'')-Ib, aph(6)-Id, bla<sub>CTX-M-27</sub>, dfrA17, mph(A), sul1, tet(A)</i>                                   | F100:A-B10 | <i>intI1</i> |
| SRR7967827  | Human   | NA | B2 | 73   | <i>aadA1, aph(3'')-Ib, aph(6)-Id, bla<sub>TEM-1B</sub>, dfrA1, sul1, sul2</i>                                                | F1:A1:B20  | <i>intI1</i> |
| SRR7967830  | Human   | NA | F  | 62   | <i>aadA1, dfrA1, gyrA, tet(A)</i>                                                                                            | F29:A-B10  | <i>intI1</i> |
| SRR7967833  | Human   | NA | B2 | 95   |                                                                                                                              | F29:A-B10  |              |
| SRR7967835  | Human   | NA | D  | 349  |                                                                                                                              | F-A-B-     |              |
| SRR7967838  | Human   | NA | B2 | 95   | <i>bla<sub>TEM-1B</sub></i>                                                                                                  | F18:A-B1   |              |
| SRR7967839  | Human   | NA | B2 | 131  | <i>aadA1, bla<sub>TEM-1B</sub>, dfrA17, gyrA, mph(A), sul1</i>                                                               | F2:A1:B-   | <i>intI1</i> |
| SRR7967840  | Human   | NA | B2 | 95   | <i>aph(3'')-Ib, aph(6)-Id, gyrA, tet(B)</i>                                                                                  | F24:A-B1   |              |
| SRR7967841  | Human   | NA | B2 | 95   | <i>aadA2, bla<sub>TEM-1B</sub>, catA1, dfrA12, mph(A), sul1, tet(B)</i>                                                      | F1:A1:B23  | <i>intI1</i> |

|            |       |    |    |      |                                                                                                                                                                                   |            |              |
|------------|-------|----|----|------|-----------------------------------------------------------------------------------------------------------------------------------------------------------------------------------|------------|--------------|
| SRR7967843 | Human | NA | B2 | 131  | <i>aadA5, aph(3'')-Ib, aph(6)-Id, dfrA17, gyrA, mph(A), sul1, sul2, tet(A)</i>                                                                                                    | F29:A-B10  | <i>intI1</i> |
| SRR7967846 | Human | NA | B2 | 12   | <i>aadA1, bla<sub>TEM-1B</sub>, dfrA1, sul1, tet(B)</i>                                                                                                                           | F-A1:B23   | <i>intI1</i> |
| SRR7967847 | Human | NA | B2 | 95   | <i>dfrA5</i>                                                                                                                                                                      | F2:A-B1    | <i>intI1</i> |
| SRR7967850 | Human | NA | B2 | 95   | <i>aadA1, aadA2, cmlA1, dfrA12, mef(B), sul3</i>                                                                                                                                  | F18:A-B1   | <i>intI1</i> |
| SRR7967851 | Human | NA | B2 | 1193 | <i>aph(3'')-Ib, aph(6)-Id, bla<sub>TEM-1B</sub>, dfrA17, gyrA, sul2, tet(B)</i>                                                                                                   | F-A1:B10   | <i>intI1</i> |
| SRR7967853 | Human | NA | B2 | 5242 |                                                                                                                                                                                   | F-A-B-     |              |
| SRR7967855 | Human | NA | B2 | 73   | <i>aadA1, bla<sub>TEM-1B</sub>, sul1</i>                                                                                                                                          | F51:A-B10  | <i>intI1</i> |
| SRR7967856 | Human | NA | B2 | 73   |                                                                                                                                                                                   | F29:A-B10  |              |
| SRR7967857 | Human | NA | B2 | 73   | <i>bla<sub>TEM-1B</sub></i>                                                                                                                                                       | F2:A-B-    |              |
| SRR7967881 | Human | NA | B2 | 131  | <i>aadA5, bla<sub>TEM-1B</sub>, dfrA17, mph(A), sul1</i>                                                                                                                          | F22:A1:B20 | <i>intI1</i> |
| SRR7967882 | Human | NA | B2 | 131  | <i>catA1, dfrA14, mph(A), tet(B)</i>                                                                                                                                              | F1:A1:B1   | <i>intI1</i> |
| SRR7967884 | Human | NA | B2 | 73   | <i>aph(3')-Ia, aph(3'')-Ib, aph(6)-Id, dfrA17, gyrA, mph(A), sul2, tet(B)</i>                                                                                                     | F2:A-B10   | <i>intI1</i> |
| SRR7967885 | Human | NA | B2 | 131  | <i>aac(3)-IIa, aac(6')-Ib-cr, aadA5, aph(3'')-Ib, aph(6)-Id, bla<sub>CTX-M-15</sub>, bla<sub>OXA-1</sub>, bla<sub>TEM-1C</sub>, catB3, floR, dfrA17, gyrA, mph(A), sul1, sul2</i> | F31:A4:B1  | <i>intI1</i> |
| SRR7967890 | Human | NA | D  | 38   | <i>aac(3)-IIa, aac(3)-IId, aadA5, ampC, aph(3'')-Ib, aph(6)-Id, bla<sub>CTX-M-15</sub>, bla<sub>TEM-1B</sub>, dfrA17, gyrA, mph(A), sul1, sul2, tet(A)</i>                        | F29:A-B34  | <i>intI1</i> |
| SRR7967895 | Human | NA | B2 | 131  | <i>aadA5, aph(3'')-Ib, aph(6)-Id, bla<sub>CTX-M-27</sub>, dfrA17, gyrA, mph(A), sul1, sul2, tet(A)</i>                                                                            | F1:A2:B20  | <i>intI1</i> |
| SRR7967896 | Human | NA | A  | 10   | <i>aadA1, bla<sub>OXA-1</sub>, catA1, gyrA, tet(B)</i>                                                                                                                            | F2:A-B-    | <i>intI1</i> |
| SRR7967897 | Human | NA | B2 | 73   | <i>aadA1, bla<sub>SHV-1</sub>, bla<sub>SHV-102</sub>, bla<sub>SHV-48</sub>, gyrA, sul1</i>                                                                                        | F51:A-B10  | <i>intI1</i> |
| SRR7967898 | Human | NA | D  | 393  | <i>aadA5, bla<sub>CTX-M-15</sub>, dfrA17, erm(B), gyrA, mph(A), sul1</i>                                                                                                          | F-A1:B32   | <i>intI1</i> |
| SRR7967899 | Human | NA | B2 | 95   | <i>tet(B)</i>                                                                                                                                                                     | F24:A-B-   |              |
| SRR7967900 | Human | NA | B1 | 164  |                                                                                                                                                                                   | F-A-B-     |              |
| SRR7967901 | Human | NA | B1 | 127  | <i>aadA1, bla<sub>TEM-34</sub>, sul1</i>                                                                                                                                          | F51:A-B10  | <i>intI1</i> |
| SRR7967903 | Human | NA | D  | 69   | <i>bla<sub>TEM-1B</sub>, sul1</i>                                                                                                                                                 | F29:A-B10  |              |
| SRR7967906 | Human | NA | D  | 349  | <i>aph(3'')-Ib, aph(6)-Id, bla<sub>TEM-1B</sub>, catA1, dfrA7, sul1, sul2, tet(A)</i>                                                                                             | F4:A-B-    | <i>intI1</i> |
| SRR7967907 | Human | NA | B2 | 131  | <i>bla<sub>TEM-1B</sub>, catA1, dfrA7, sul1, tet(B)</i>                                                                                                                           | F1:A1:B23  | <i>intI1</i> |
| SRR7967908 | Human | NA | D  | 549  | <i>bla<sub>TEM-1B</sub>, dfrA5</i>                                                                                                                                                | F-A-B1     | <i>intI1</i> |
| SRR7967909 | Human | NA | B2 | 73   | <i>bla<sub>TEM-1B</sub>, sul2</i>                                                                                                                                                 | F29:A-B10  |              |
| SRR7967911 | Human | NA | D  | 69   | <i>bla<sub>TEM-1B</sub>, sul2</i>                                                                                                                                                 | F-A-B1     | <i>intI1</i> |
| SRR7967912 | Human | NA | F  | 648  | <i>gyrA</i>                                                                                                                                                                       | F-A-B-     |              |
| SRR7967919 | Human | NA | B2 | 73   | <i>aadA1, bla<sub>TEM-141</sub>, bla<sub>TEM-1B</sub>, bla<sub>TEM-206</sub>, bla<sub>TEM-213</sub>, bla<sub>TEM-33</sub>, bla<sub>TEM-34</sub>, bla<sub>TEM-57</sub>, sul1</i>   | F51:A-B10  | <i>intI1</i> |
